# Supplementary material
Source: Springer Nature journal article supplement (https://www.springermedizin.de/resource/supplementary/12884_2008_177_MOESM11_ESM.pdf/9459788)
Supplement: MOESM11 [file 9459788]

# Index Test

# Study Details

# Likelihood ratio of a positive test (95% CI)

# Likelihood ratio of a negative test (95% CI)

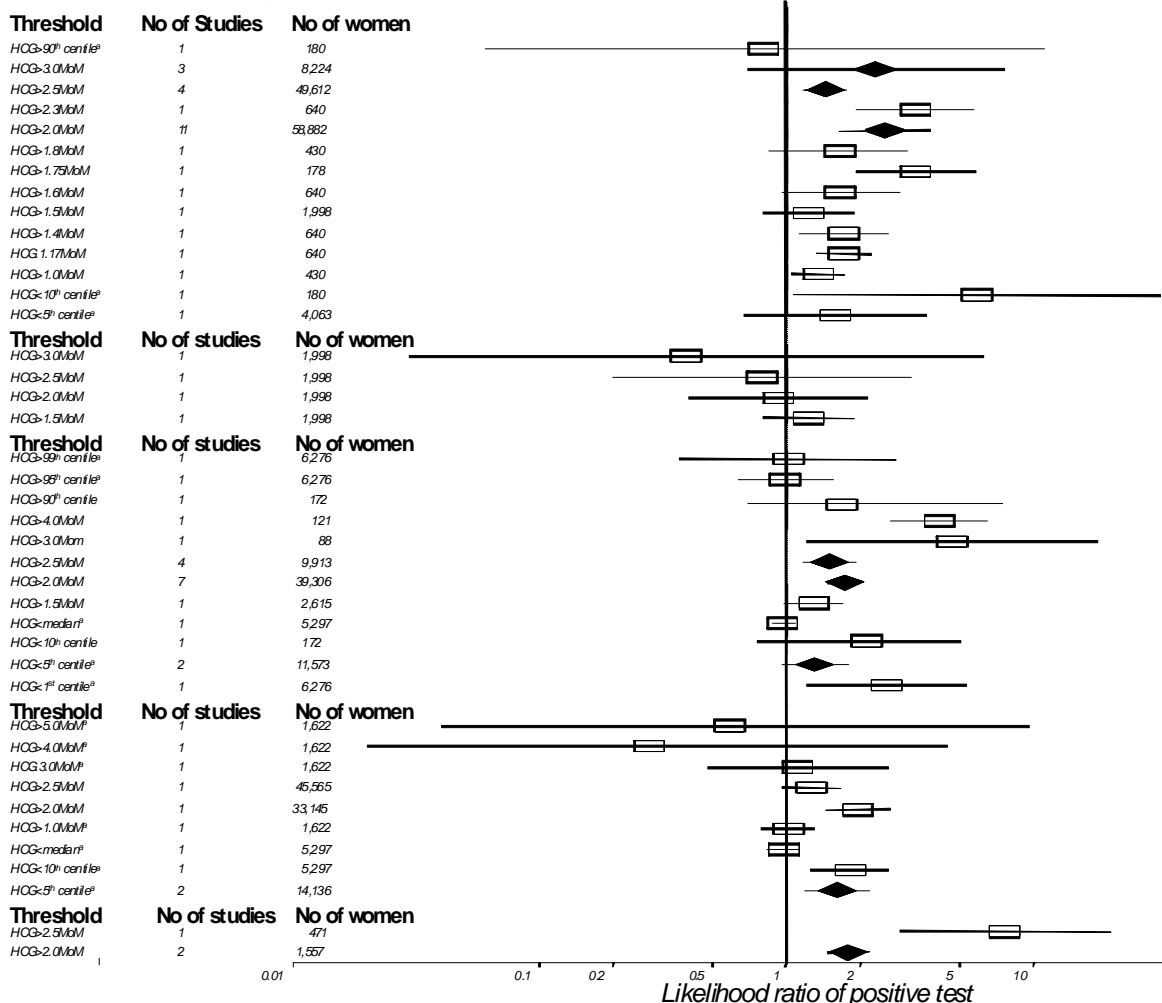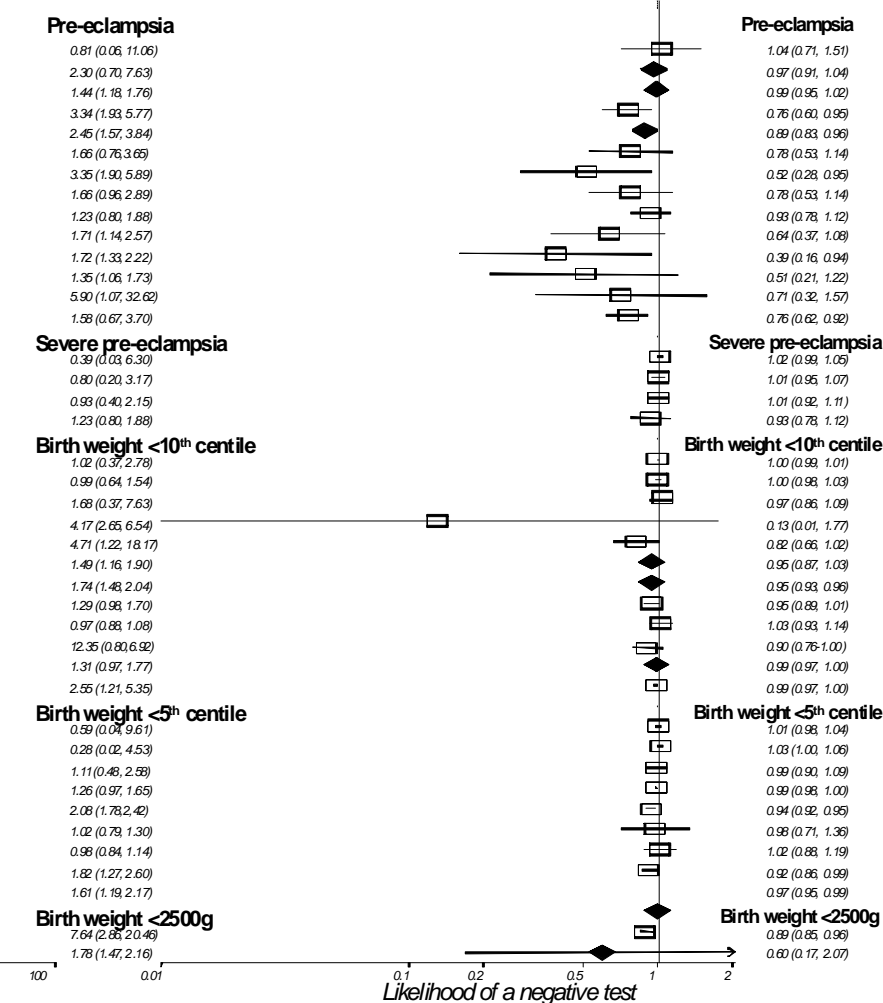

Likelihood ratio of positive test

Likelihood of a negative test
